# Supplementary material for: ERP Correlates of Encoding Success and Encoding Selectivity in Attention Switching
Source: PLoS One. 2016 Dec 1;11(12):e0167396. doi: 10.1371/journal.pone.0167396 (PMC5131936; doi:10.1371/journal.pone.0167396)
Supplement: S1 File — (XLSX) [file pone.0167396.s001.xlsx]

## Sheet: behav. mode x switch RT
repeat bivalent	repeat univalent	switch bivalent	switch univalent
1556.28	1394.62	1717.2	1639.99
1063.42	1002.72	1200.03	1074.14
929.38	954.28	1279.64	1315.17
1015.4	886.69	1192.03	1258.8
988.18	1003.23	1224.68	1182.26
1043.64	1003.01	1170.01	1072.41
986.14	971.37	1574.43	1631.9
930.78	827.8	1226.78	1084.42
654.47	653.03	685.14	689.07
812.23	817.61	939.12	884.94
767.44	757.69	849.35	880.35
1113.4	1031.82	1555.42	1347.57
665.37	639.68	780.53	707.28
797.94	777.27	858.66	835.7
1344.81	1286.39	1621.4	1666.28
963.32	1023.31	1165.13	1150.98

## Sheet: behav. mode x switch error
repeat bivalent	repeat univalent	switch bivalent	switch univalent
0.03	0.04	0.05	0
0.06	0.11	0.05	0.16
0.06	0	0.06	0
0.06	0	0.05	0
0.02	0	0.06	0.04
0.02	0.08	0.1	0.02
0.06	0.09	0.06	0.08
0.03	0.04	0.1	0.02
0.02	0.03	0.02	0.04
0.06	0.02	0.05	0.12
0.02	0	0.01	0.02
0.09	0.02	0.05	0.05
0.02	0.04	0.03	0
0	0	0	0.02
0.03	0.04	0.01	0
0.02	0.04	0.02	0

## Sheet: behav. att x sw
switch attended	switch unattended	repeat attended	repeat unattended
3.44	2.83	3.58	2.48
4.79	3.57	4.75	3.56
4.73	3.17	4.82	3.24
4.63	3.19	4.91	3.22
4.97	2.88	4.84	3.2
4.46	3.46	4.56	3.33
3.76	3.27	4.13	2.95
4.32	3.19	4.22	3.1
4.73	2.75	4.69	2.81
4.34	3.94	4.51	3.47
4.6	3.28	5.38	3.33
4.12	3.52	4.25	2.97
4.65	3.95	5.16	3.51
4.58	2.69	4.64	2.51
4.35	2.7	3.87	2.76
4.22	2.81	4.31	2.85

## Sheet: behav. memory selectivity RT
repeat bin 1	repeat bin 2	repeat bin 3	switch bin 1	switch bin 2	switch bin 3
1378.93	1535.97	1532.34	1453.38	1766	1974.26
1225.57	1011.64	1022.36	1101.15	1002.07	1355.92
952.04	956.26	914.14	1174.32	1232.81	1478.55
957.09	1116.73	1003.21	1242.83	1109.13	1245.2
982.37	1021.59	1016.75	1257.47	1167.19	1328.13
1089.56	1084.05	1055.79	1285.84	1147.67	1186.93
1165	1026.29	916.54	1725.21	1407.24	1766.81
913.68	842	1009.07	995.52	1367.5	1492.59
682.83	671.26	628.85	702.8	689.07	665.56
858.17	769.93	879.57	895.21	1052.32	997.14
800.09	742.15	783.39	842.67	859.61	836.82
1133.58	1096.72	1204.15	1622.54	1513.57	1634.24
692.4	657.51	644.94	746.59	767.19	777.08
813.95	810.5	787.7	818.79	856.2	933.16
1389.58	1174.68	1323.39	1650.37	1621.29	1538.93
1057.34	910.47	896.13	1052	1146.62	1221.46

## Sheet: behav. memory selectivity error
repeat bin 1	repeat bin 2	repeat bin 3	switch bin 1	switch bin 2	switch bin 3
0	0.06	0.03	0.03	0.11	0.04
0.04	0.13	0.03	0.04	0.03	0.04
0.04	0.13	0.03	0.03	0.03	0.14
0	0.02	0.13	0	0.12	0.05
0.07	0	0	0.06	0	0.11
0	0	0.07	0.03	0.13	0.17
0.07	0.05	0.06	0.03	0.06	0.09
0.09	0.03	0	0.03	0.08	0.1
0.08	0	0	0	0.03	0.03
0.08	0.07	0.05	0.06	0.06	0.03
0	0.02	0.04	0	0	0
0.03	0.1	0.13	0.07	0.04	0.04
0.07	0	0	0.06	0	0.04
0	0	0	0	0	0
0.03	0	0.05	0	0	0.03
0.03	0.03	0	0.03	0.04	0

## Sheet: behav. global memory RT
repeat bin 1	repeat bin 2	repeat bin 3	switch bin 1	switch bin 2	switch bin 3
1697.07	1390.79	1416.18	1735.65	1623.36	1749.37
1118.35	1074.68	1015.8	1096.33	1266.54	1102.07
897.39	940.82	980.46	1234.51	1411.59	1296.81
1123.93	1054.05	902.4	1208.75	1181.65	1252.14
1009.88	1027.3	992.33	1326.33	1209.85	1215.28
1074.44	1097.27	1051.48	1257.6	1144.71	1241.51
950.95	1086.29	1041.67	1439.58	1723.32	1633.71
1045.77	915.14	715.93	1679.14	1216.41	1088.93
676.5	658.73	654	739.15	663.66	655.72
879.91	821.75	752.48	971.19	964.63	1026.44
788.76	752.75	768.53	828.38	802.47	897.97
1069.42	1208.55	1113.8	1498.37	1568.51	1655.55
658.61	683.7	647.89	774.67	727.63	791.04
761.32	801.75	833.64	937.77	843.32	835.48
1124.07	1305.54	1453.55	1548.56	1543.7	1779.88
951.92	975.55	903.05	1195.7	1128.13	1061.29

## Sheet: behav. global memory error
repeat bin 1	repeat bin 2	repeat bin 3	switch bin 1	switch bin 2	switch bin 3
0.06	0	0.04	0.07	0.03	0.06
0.07	0.11	0	0.03	0.08	0
0.06	0.07	0.07	0.08	0	0.11
0.1	0	0.09	0.08	0	0.05
0.07	0	0	0.11	0.03	0.03
0.04	0.04	0.03	0.17	0.08	0.08
0.03	0.06	0.09	0.06	0.04	0.08
0.07	0	0.06	0.12	0.05	0.06
0.04	0.02	0	0	0.05	0
0.06	0.08	0.06	0.03	0.11	0
0.04	0.02	0	0	0	0
0.07	0.12	0.05	0.04	0.03	0.09
0	0.06	0	0	0.08	0
0	0	0	0	0	0
0.03	0	0.05	0.03	0	0
0	0	0.04	0.04	0.03	0

## Sheet: EEG cue memory selectivity
words switch high frontal 0-300	words switch low frontal 0-300	objects switch high frontal 0-300	objects switch low frontal 0-300	words switch high posterior 0-300	words switch low posterior 0-300	objects switch high posterior 0-300	objects switch low posterior 0-300	words switch high frontal 300-600	words switch low frontal 300-600	objects switch high frontal 300-600	objects switch low frontal 300-600	words switch high posterior 300-600	words switch low posterior 300-600	objects switch high posterior 300-600	objects switch low posterior 300-600	words switch high frontal 600-900	words switch low frontal 600-900	objects switch high frontal 600-900	objects switch low frontal 600-900	words switch high posterior 600-900	words switch low posterior 600-900	objects switch high posterior 600-900	objects switch low posterior 600-900	words switch high frontal 900-1200	words switch low frontal 900-1200	objects switch high frontal 900-1200	objects switch low frontal 900-1200	words switch high posterior 900-1200	words switch low posterior 900-1200	objects switch high posterior 900-1200	objects switch low posterior 900-1200	words repeat high frontal 0-300	words repeat low frontal 0-300	objects repeat high frontal 0-300	objects repeat low frontal 0-300	words repeat high posterior 0-300	words repeat low posterior 0-300	objects repeat high posterior 0-300	objects repeat low posterior 0-300	words repeat high frontal 300-600	words repeat low frontal 300-600	objects repeat high frontal 300-600	objects repeat low frontal 300-600	words repeat high posterior 300-600	words repeat low posterior 300-600	objects repeat high posterior 300-600	objects repeat low posterior 300-600	words repeat high frontal 600-900	words repeat low frontal 600-900
-2.69	1.59	2.58	0.21	-0.15	1.42	2.62	0.18	-2.62	1.69	3.29	-1	0.86	1.55	1.33	-1.25	-2.02	1.64	2.98	-0.43	1.22	1.6	2.03	-0.67	-1.87	-0.23	3.22	-0.23	1.33	-0.72	2.4	-0.18	0.19	1.68	2.95	0.83	0.92	1.28	1.58	2.31	-0.3	1.62	2.59	1.17	-1.58	-0.03	-0.62	-0.57	-0.42	2.8
-1.55	-3.54	-1.05	-1.97	-1.22	-1.17	1.61	-0.88	-3.65	-4.64	-5.32	-3.31	-1.4	-1.09	-2.37	-1.8	-1.97	0.1	-6.14	-1.29	1.48	2.84	-2.39	0.09	-2.33	-0.49	-4.6	1.77	0.6	1.4	-0.91	-0.46	-0.4	-2.22	-5.03	-0.62	-2.18	-0.44	-1.55	-1.38	-5.98	-5.32	-4.55	-3.27	-4.78	-2.5	1.52	-4.4	-4.86	-1.5
-3.56	-1.9	-0.84	-0.02	-0.1	2.36	1.96	3.45	-10.51	-1.73	-3.59	-2.89	-3.06	5.58	1.66	3.17	-10.56	-3.34	-4.66	-3.39	-2.91	2.96	2.87	2.57	-11.91	-0.58	-3.74	-4.56	-4.97	3.41	4.07	0.97	1.13	-2.58	-1.94	-2.18	2.21	3.92	1.49	1.49	-3.64	-8.58	-9.47	-5.34	-0.94	2.85	-2.45	-0.28	-2.53	-6.73
0.51	1.73	3.81	1.91	1.19	6.47	6.24	5.23	2.74	1.83	2.32	-0.13	5.7	8.66	8.63	7.22	1.33	0.15	3.19	-1.85	1.98	6.16	7.8	5.48	3.07	-1.52	1.81	-0.75	1.46	4.63	4.73	5.15	2.67	1.71	0.33	1.63	5.58	3.16	1.9	4.58	0.21	-0.14	-1.53	-0.06	6.06	3.48	0.78	4.65	0.1	-1.4
-1.59	-0.55	-2.59	-3.11	1.09	0.44	-0.56	4.28	-3.72	-1.56	-2.32	2.01	-0.98	2.21	2.58	5.36	-2.3	-1.49	0.34	3.5	-1.45	0.95	5.24	7.39	-3.41	-1.72	5.47	4.13	-1.28	0.42	4.66	4.89	-1.91	0.34	0.28	2.72	-0.81	-0.5	-2.12	4.28	-2.28	-0.03	-1.49	8.01	-1.2	-3.43	-3.46	7.21	3.76	5.55
0.38	1.2	2.98	2.46	3.66	4.61	5.59	5.36	1.56	3.43	7.26	4.79	3.07	6.25	7.92	7.72	0.05	2.89	5.5	5.3	2.01	6.87	8.07	9.48	0.83	3.27	4.2	6.79	4.06	6.69	7.51	10.73	2.45	1.41	7.62	4.2	3.89	4.96	10.27	8.95	3.37	4.88	6.3	5.03	3.1	7.9	7.13	9.72	0.7	4.75
1.54	0.64	2.27	1.02	0.19	1.01	1.75	-0.53	1.7	1.64	5.38	3.1	0.46	0.34	0.83	-2.33	-1.09	-1.26	1.2	0.77	-1.3	0.45	-0.91	-2.36	-3.42	-5.51	0.67	0.57	-3.05	-4.23	-2.29	-3.12	6.07	3.12	2.69	2.07	2.94	1.95	-0.33	-0.68	8.5	2.59	3.46	4.61	0.69	-2.11	-2.07	-2.34	2.99	-1.01
-2.42	-4.31	-2.53	-2.26	1.78	-1.37	1.89	0.61	-2.87	-5.85	-2.03	-3.37	2.75	0.42	4.06	1.86	0.53	-0.96	-0.53	-2.19	3.27	2.04	3.08	-0.64	-1.27	-3.43	-2.97	-1.06	1.06	-0.61	-0.28	-2.05	-1.62	0.76	-1.95	-1.19	1.89	5.8	2.76	-0.88	-3.15	-2.44	-1.1	-4.04	0.91	2.74	3.38	-3.14	2.33	-1
-1.44	3.79	2.64	4.82	-0.37	3.03	3.76	6.26	-1.01	2.93	2.31	3.39	1.35	5.43	5.64	7.11	0.25	4.88	4.74	6.37	-0.17	6.39	5.47	7.54	0.52	1.8	5.24	4.97	-0.98	3.02	4.35	5.28	1.98	2.11	-0.33	1.66	2.13	2.39	-0.34	2.01	1.66	-0.28	-1.66	1.19	1.46	0.4	0.61	1.16	3.31	0.1
-0.44	-1.46	1.24	-0.3	-1.21	-0.15	2.38	0.45	1.39	2.85	4.75	0.05	-0.93	2.81	2.65	-1.07	1.71	3.13	5.35	-0.29	2.8	4.77	5.74	0.23	1.45	4.1	5.02	-0.67	3.36	6.8	6.28	-1.81	0.4	0.8	-0.29	-2.29	-1.81	1.64	-0.69	-0.74	-0.75	0.56	-1.49	-0.88	-3.2	1.21	-2.8	0.61	0.14	-0.78
0.14	-0.65	-0.58	-0.55	3.39	3.19	4.22	1.41	-0.61	-1.5	-1.04	-3.61	4.6	5.3	8.02	-0.49	6.23	1.32	0.27	-1.1	9.17	7.14	11.72	2.72	6.15	-1.12	0.35	-4.95	9.67	6.23	12.12	-0.23	1.91	1.39	-3.97	1.52	6.31	4.31	-0.95	2.95	0.83	0.61	-8.01	-0.39	6.99	3.49	-3.21	1.51	3.2	2.26
-0.21	-2.78	-0.76	-1.89	0.82	2.56	1.31	2.8	0.36	-7.05	-2.36	-5.07	-3	-3.71	-2.9	-2.84	-4.48	-7.15	-6.85	-6.74	-8.86	-7.95	-9.69	-8.07	-9.61	-12.65	-9.72	-11.37	-13.24	-12.72	-13.38	-12.59	-4.51	-0.84	-1.51	-3.64	-1.43	2.02	-1.34	-3.16	-5.72	-3.48	-2.19	-1.43	-4.71	-4.19	-3.58	-3.8	-8.39	-4.64
-1.86	-2.34	0.37	-1.43	0.55	1.75	2.97	2.61	1.24	-0.69	1.94	1.18	1.2	2.25	3.16	4.07	4.45	-0.49	4.71	3.16	0.56	0.88	4.28	5.93	3.5	-0.53	5.42	4.65	0.67	-0.63	4.87	5.16	-2.84	-1.94	-2.6	-1.79	1.2	2.11	0.52	1.8	-2.82	0.53	-0.17	-0.86	-0.16	2.33	0.65	-0.11	-1.5	-0.71
2.89	2.92	0.67	-1.06	1.4	3.24	1.39	0.37	2.39	6.17	3.81	0.22	-0.77	2.92	2.22	0.13	0.13	4.5	0.24	2.03	-1.4	2.34	0.43	1.8	1.77	1.69	-1.44	0.35	-2.77	-0.51	-1.49	0.08	0.2	0.27	0.74	3.9	0.37	-0.4	1.36	3.38	1.52	3.01	2.66	5.56	-2	-1.02	-1.11	1.55	1.53	3.61
[truncated: 14 more columns]

## Sheet: EEG cue global memory 
words switch high frontal 0-300	words switch low frontal 0-300	objects switch high frontal 0-300	objects switch low frontal 0-300	words switch high posterior 0-300	words switch low posterior 0-300	objects switch high posterior 0-300	objects switch low posterior 0-300	words switch high frontal 300-600	words switch low frontal 300-600	objects switch high frontal 300-600	objects switch low frontal 300-600	words switch high posterior 300-600	words switch low posterior 300-600	objects switch high posterior 300-600	objects switch low posterior 300-600	words switch high frontal 600-900	words switch low frontal 600-900	objects switch high frontal 600-900	objects switch low frontal 600-900	words switch high posterior 600-900	words switch low posterior 600-900	objects switch high posterior 600-900	objects switch low posterior 600-900	words switch high frontal 900-1200	words switch low frontal 900-1200	objects switch high frontal 900-1200	objects switch low frontal 900-1200	words switch high posterior 900-1200	words switch low posterior 900-1200	objects switch high posterior 900-1200	objects switch low posterior 900-1200	words repeat high frontal 0-300	words repeat low frontal 0-300	objects repeat high frontal 0-300	objects repeat low frontal 0-300	words repeat high posterior 0-300	words repeat low posterior 0-300	objects repeat high posterior 0-300	objects repeat low posterior 0-300	words repeat high frontal 300-600	words repeat low frontal 300-600	objects repeat high frontal 300-600	objects repeat low frontal 300-600	words repeat high posterior 300-600	words repeat low posterior 300-600	objects repeat high posterior 300-600	objects repeat low posterior 300-600	words repeat high frontal 600-900	words repeat low frontal 600-900
1.28	-2.55	2.1	0.53	2.12	-0.99	2.13	0.64	0.27	-1.26	2.61	0.19	1.7	0.67	0.11	0.41	0.59	-1.04	1.85	0.77	2.22	0.52	0.53	0.92	-1.15	-0.95	3.05	0.29	0.31	0.3	0.32	2.26	-0.71	2.13	3.33	0.26	-1.07	3.24	2.48	0.49	-0.5	1.22	3.66	-0.26	-2.76	0.7	-0.81	-1.14	-0.92	2.29
-3.58	-1.24	-2.22	-0.91	-2.02	-0.02	-0.94	1.42	-6.66	-0.69	-5.81	-2.87	-2.79	0.96	-3.26	-1	-3.03	2.21	-4.2	-3.05	0.37	4.81	-1.15	-1.03	-2.8	0.72	-2.79	0.14	0.69	1.5	-3.25	1.66	-2.81	-0.47	-2.5	-3.28	-3.44	0.9	-0.42	-2.19	-6.38	-4.88	-2.81	-4.72	-5.78	-1.3	-1.54	-1.06	-3.72	-1.95
-1.33	-3.62	-0.58	-0.35	3.24	-0.21	1.85	3.48	-3.88	-8.13	-4.78	-1.61	3.98	-0.99	1.29	3.5	-4.77	-8.78	-3.62	-4.62	1.51	-1.31	2.58	2.9	-3.72	-8.64	-2.35	-6.06	2.02	-3.04	3.97	1.26	1.98	-2.53	-3.34	-0.61	4.25	2.12	1.51	1.15	-4.17	-7.29	-8.42	-5.39	2.55	-0.38	-0.4	-2.5	-4.89	-4.25
1.34	1.06	1.72	3.23	6.18	2.32	5.33	5.8	2.33	2.15	-0.56	1.67	10.19	4.84	8.14	7.56	0.09	1.19	-2.17	1.51	7.51	1.48	5.4	6.99	0.97	0.09	-0.82	0.9	7.37	-0.44	5.51	4.67	2.55	1.98	1.04	1.46	4.89	4.27	4.87	3.11	1.01	-1	2.06	-1.79	5.89	4.03	7.61	0.97	0.69	-1.87
-3.24	3.84	-4.56	0.06	0.68	1.16	2.28	3.09	-4.19	0.44	-2.2	5.4	0.66	-0.45	3.03	6.85	-3.26	1.16	0.66	5.55	-0.83	0.42	5.39	8.92	-7.25	8.16	1.76	9.82	-2.67	4.43	3.29	7.59	-0.64	0.59	-0.77	3.32	-0.89	0.61	-2.26	4.36	-1.97	4.26	3.15	5.4	-2.15	-4.95	-0.32	5.44	2.76	14.27
1.33	0.06	1.53	2.98	4.93	3.09	4.41	5.58	3.08	1.59	1.47	7.88	4.97	3.92	3.02	9.89	1.22	1.43	1.09	7.19	3.37	5.09	4.41	10.65	2.29	1.47	2.27	6.56	5.18	5.29	6.15	10.09	0.79	2.94	4.52	6.92	2.95	5.29	8.79	10.19	2.12	5.3	2.24	7.98	3.04	6.41	5.95	10.01	1.92	2.57
0.86	1.38	2.12	1.14	0.44	0.74	2.04	-1.03	1.87	1.45	5.46	2.88	0.83	-0.06	1.85	-3.78	-0.6	-1.8	1.72	0.09	-0.64	-0.27	0.18	-3.81	-4.7	-4.11	1.46	-0.43	-3.2	-4.07	-2.29	-3.17	4.44	4.83	1.19	3.79	2.01	2.81	-2.47	1.87	4.32	6.71	2.47	6.01	-0.84	-0.49	-4.09	0.08	-1.69	3.14
-4.74	-2.3	-3.24	-1.3	-0.46	0.57	0.61	2.2	-6.14	-3	-3.74	-1.21	0.65	2.25	1.25	5.39	-1.8	1.07	-2.24	-0.07	1.96	3.17	-0.08	3.22	-4.46	-0.65	-3.08	-0.73	-1.94	2	-2	0.07	-1.87	0.68	-1.2	-1.53	1.57	5.61	1.47	-0.53	-5.07	-1.26	-2.29	-2.69	-1.02	3.82	0.27	-0.63	-0.91	1.47
0.67	1.68	4.06	3.33	0.46	2.2	5.03	4.87	0.66	1.26	1.98	3.58	2.25	4.53	4.29	8.21	2.03	3.1	4.03	6.86	1.99	4.23	3.98	8.7	-0.71	3.02	2.76	7.25	-0.76	2.81	1.86	7.46	1.82	2.13	0.78	0.29	2.97	2.03	1.66	-0.04	0.57	0.67	-0.45	-0.54	1.47	0.72	1.24	0.59	-0.91	2.47
0.12	-2	2.14	-0.82	0.39	-1.69	5.56	-1.52	3	1.31	4.21	0.57	1.22	0.75	5.41	-2.71	3.63	1.29	3.18	1.31	4.35	3.29	7.17	-0.5	2.59	3.01	3.56	0.47	6.3	3.98	6.31	-1.54	-0.17	1.3	-1.75	-0.32	-0.6	-0.77	-1.86	0.1	0.76	-1.49	-2.19	-0.68	1.22	-5.02	-1.57	-1.87	2	-2.52
0.22	-0.85	0.03	-1.08	4.39	2.07	2.36	2.9	0.31	-2.64	-1.77	-3.09	6.67	3.12	3.84	2.78	3.37	3.75	-0.17	-0.78	7.82	8.33	6.37	6.98	0.67	3.85	-2.58	-2.63	6.65	9.04	4.57	5.8	-0.46	3.35	-2.46	-0.17	4.36	6.2	-0.29	2.29	-0.62	1.78	-5.11	-3.78	4.71	5.9	-2.52	0.85	0.76	4.34
1.27	-3.31	-1.61	-0.99	2.1	0.65	1.86	2.1	1.01	-4.97	-5.94	-1.63	-1.45	-5.01	-5.56	-0.59	-2.58	-8.07	-8.59	-5.29	-6.7	-10.46	-11.65	-6.67	-7.54	-13.6	-11.66	-9.48	-10.2	-15.95	-15.2	-11.18	-3.74	-2.36	-0.51	-3.83	-0.83	0.7	0.8	-4.14	-3.91	-5.65	0.06	-3.04	-3.22	-5.68	-0.69	-5.61	-7.12	-6.65
-0.82	-3.1	-3.75	2.08	1.9	0.51	1.49	3.98	2.59	-1.49	-0.19	3.11	3.24	0.48	3.3	3.85	4.43	0.2	2.14	5.9	0.83	0.62	3.96	6	3.11	0.33	2.64	7.15	0.53	-0.34	3.8	5.97	-1.51	-3.17	-2.45	-1.85	2.04	1.36	1.8	0.92	0.03	-2.04	-3.17	0.96	1.95	0.43	-1.42	1.23	0.31	-2.41
2.47	3.29	1.37	-1.09	3.94	0.98	0.29	1.28	2.78	5.65	4.56	0.59	1.31	0.96	0.54	1.65	3.23	1.64	0.46	1.48	2.22	-0.94	-1.1	2.42	-0.17	3.36	0.56	-1.29	-0.72	-2.36	-2.66	0.44	-0.92	0.92	0.19	3.97	-0.62	0.34	0.86	3.59	1.06	3.01	2.38	5.38	-1.79	-1.33	-0.73	0.69	1.49	3.24
[truncated: 14 more columns]

## Sheet: EEG cue switch related effects
words repeat frontal 0-300	words switch frontal 0-300	objects repeat frontal 0-300	objects switch frontal 0-300	words repeat posterior 0-300	words switch posterior 0-300	objects repeat posterior 0-300	objects switch posterior 0-300	words repeat frontal 300-600	words switch frontal 300-600	objects repeat frontal 300-600	objects switch frontal 300-600	words repeat posterior 300-600	words switch posterior 300-600	objects repeat posterior 300-600	objects switch posterior 300-600	words repeat frontal 600-900	words switch frontal 600-900	objects repeat frontal 600-900	objects switch frontal 600-900	words repeat posterior 600-900	words switch posterior 600-900	objects repeat posterior 600-900	objects switch posterior 600-900	words repeat frontal 900-1200	words switch frontal 900-1200	objects repeat frontal 900-1200	objects switch frontal 900-1200	words repeat posterior 900-1200	words switch posterior 900-1200	objects repeat posterior 900-1200	objects switch posterior 900-1200
0.69	-0.38	2.04	1.53	0.91	0.61	1.89	1.55	0.52	-0.14	1.98	1.39	-1.02	1.2	-0.6	0.19	0.92	0.26	2.18	1.48	0.46	1.49	1	0.83	-0.25	-0.87	0.81	1.7	-0.3	0.35	-0.16	1.26
-1.72	-2.66	-2.96	-1.53	-0.99	-1.21	-1.47	0.3	-5.63	-4.53	-3.95	-4.27	-3.18	-1.3	-1.25	-2.07	-2.81	-0.64	0.88	-3.6	-2.6	2.4	0.53	-1.09	-2.19	-0.82	1.59	-1.25	-3.63	1.42	0.07	-0.67
-0.92	-2.43	-2.07	-0.47	2.86	1.29	1.49	2.63	-6.51	-6.34	-7.22	-3.27	0.62	0.88	-1.27	2.33	-5.12	-7.21	-4.45	-4.09	0.21	-0.48	-0.63	2.73	-4.5	-6.65	-1.37	-4.11	1.05	-1.45	1.88	2.68
2.31	1.08	1.11	2.66	4.67	4.15	3.5	5.63	-0.06	2.32	-0.65	0.84	5	7.7	3.1	7.78	-0.67	0.77	-1.7	0.14	3.04	4.55	1.66	6.4	-1.59	0.36	-4.12	0.26	2.3	3.13	-1.28	4.98
-1.58	-0.56	1.85	-2.93	-1.31	1.14	1.97	2.57	-2.21	-2.24	4.59	0.48	-3.11	0.94	3.37	4.38	3.68	-1.41	6.66	2.39	0.97	0.16	2.74	6.63	4.42	-2.43	7.52	4.6	0.83	-0.14	0.98	4.81
2.03	0.74	5.96	2.68	4.41	4.08	9.63	5.45	3.77	2.39	5.68	5.82	4.81	4.48	8.39	7.81	1.8	1.32	4.41	5.38	3.32	4.17	7.72	8.89	2.86	1.91	4.59	5.71	3.74	5.23	7.67	9.39
4.08	0.98	2.36	1.69	2.13	0.99	-0.51	0.69	5.2	1.95	4.06	4.32	-1.36	0.7	-2.21	-0.64	1.32	-0.82	0.34	1	-0.76	-0.18	-4.26	-1.58	0.7	-4.09	-0.97	0.62	-3.04	-3.42	-6.26	-2.68
-0.24	-3.24	-1.49	-2.4	3.69	0.04	0.58	1.29	-2.69	-4.02	-2.86	-2.65	1.75	1.5	-0.53	3.03	0.53	-0.04	-1.24	-1.31	1.07	2.64	-1.09	1.33	-0.94	-2.1	-3.97	-2.07	0.53	-0.22	-2.07	-1.11
2.24	1.17	0.48	3.68	2.47	1.2	0.61	4.95	0.77	1.27	-0.51	2.82	1.02	3.62	0.83	6.34	1.72	2.7	-0.73	5.51	0.13	3.3	-0.2	6.45	2.37	1.34	-2.12	5.11	-0.53	1.19	-2.42	4.8
0.68	-1.1	-0.91	0.34	-0.7	-0.66	-0.7	1.25	-0.29	1.9	-1.3	1.99	-1.97	1	-1.75	0.46	-0.08	2.15	-0.62	2.04	-2.8	3.77	-0.94	2.5	-0.51	2.59	-1.2	1.68	-1.75	5.06	-1.32	1.53
1.79	-0.23	-1.46	-0.57	5.36	3.55	0.83	2.65	1.18	-1.19	-4.53	-2.48	5.56	5.02	-1.06	3.27	3.23	3.68	-3.62	-0.49	7.09	8.41	-0.16	6.7	0.7	2.4	-6.21	-2.61	7.37	8.08	0.58	5.23
-3.03	-1.02	-2.53	-1.28	-0.29	1.37	-2.21	1.99	-4.66	-1.98	-1.83	-3.6	-4.45	-3.23	-3.68	-2.87	-6.8	-5.32	-4.46	-6.8	-7.6	-8.58	-5.88	-8.95	-10.96	-10.57	-8.51	-10.47	-12.33	-13.08	-10.18	-13.02
-2.35	-2.2	-2.11	-0.42	1.71	1.08	1.3	2.81	-1.18	0.18	-0.59	1.61	1.27	1.63	0.19	3.56	-1.3	2.05	1.07	4.03	-0.04	0.7	0.39	5.01	-2.19	1.5	1.14	5.08	-1.81	-0.04	0.05	5
0.45	2.98	2.01	-0.15	0.22	2.37	2.17	0.91	2.44	4.26	3.82	2.1	-1.4	0.98	-0.04	1.23	2.74	2.54	4.86	1.09	-0.59	0.43	2.02	1.08	1.57	1.97	1.88	-0.59	-1.9	-1.6	0.57	-0.74

[truncated: 4 more sheets: EEG stimulus memory selectivity, EEG stimulus global memory, EEG stim global mem. centerline, EEG stim switch related effects]
